# Supplementary material for: An insight into antimycobacterial and antioxidant potentials of INH-Schiff base complexes and in silico targeting of MtKasB receptor of M. tuberculosis
Source: Royal Society of Chemistry journal article supplement (doi:10.1039/d1nj04977a), 2022-01-01
Supplement: d1nj04977a1.pdf [file d1nj04977a1.pdf]

**An insight into the antimycobacterial and antioxidant potentials of INH-Schiff base complexes and *insilico* targeting of MtKasB receptor of *M.tuberculosis***

**I. Salim Meeran<sup>1</sup>, S. William<sup>2</sup>, V.N. Azger Dusthakeer<sup>3</sup>, M. Mohamed Naseer Ali<sup>1</sup>,  
S. Syed Tajudeen<sup>4</sup>, T.K. Shabeer\*<sup>1</sup>**

**To be published in New Journal of Chemistry**

**SUPPLEMENTARY INFORMATION**

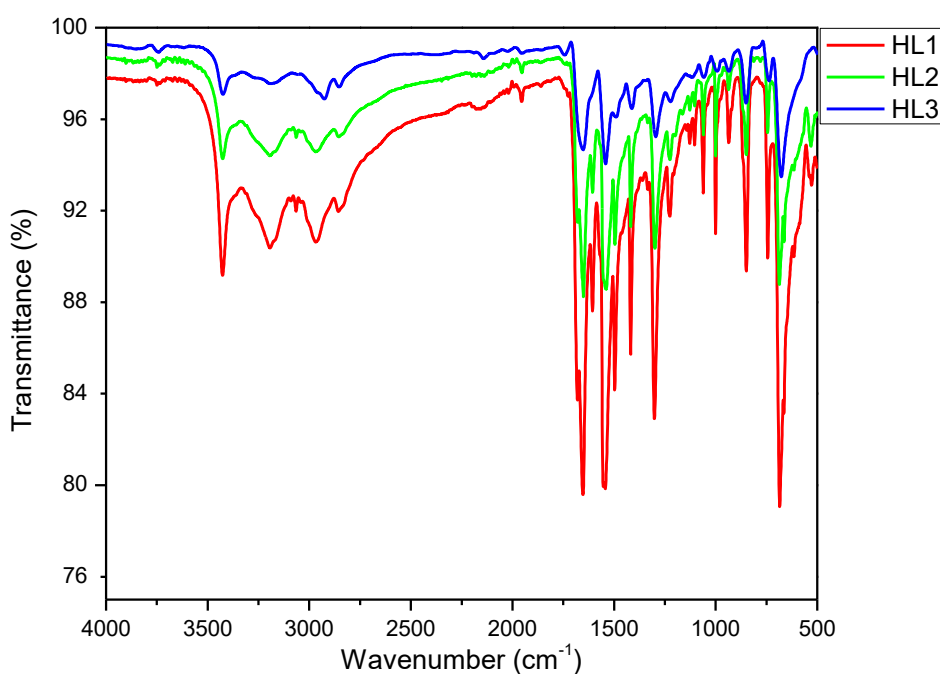

**Figure S1: FT-IR spectra of INH-Schiff base ligands (1-3)**

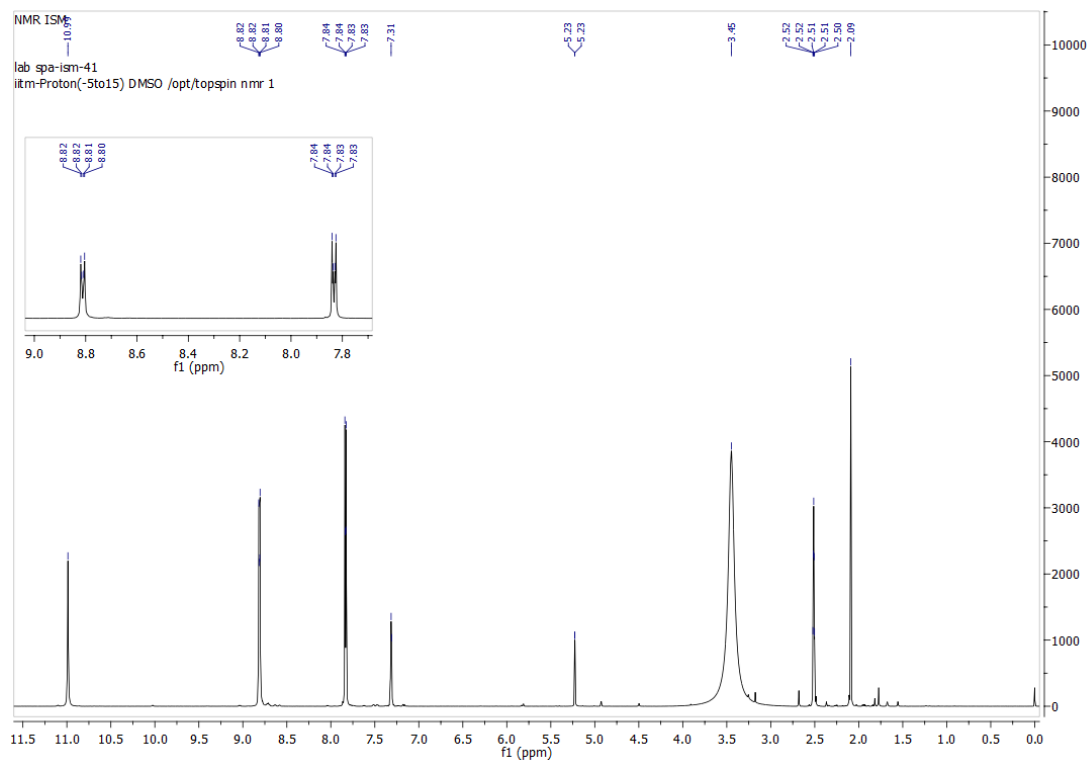

Figure S2:  $^1\text{H}$  NMR spectrum of INH-Schiff base ligand (1)

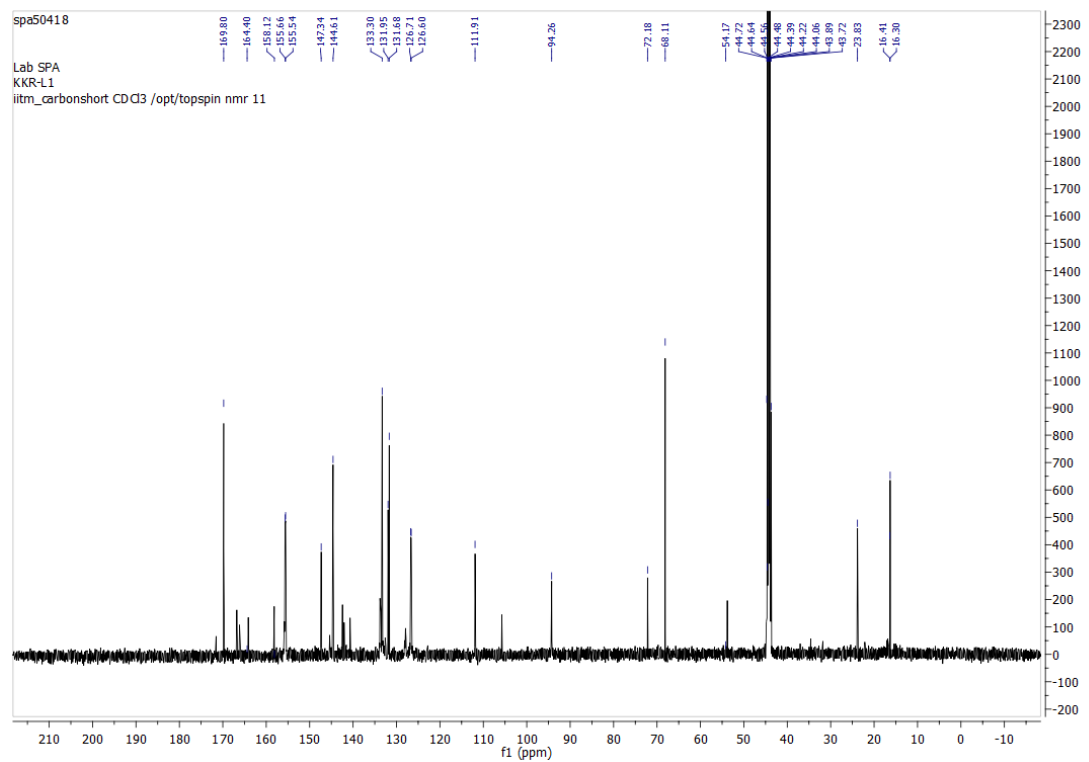

Figure S3:  $^{13}\text{C}$  NMR spectrum of INH-Schiff base ligand (1)

| <b><math>^1\text{H}</math> NMR signals</b>    |                              |                                               |                                               |                                    |
|-----------------------------------------------|------------------------------|-----------------------------------------------|-----------------------------------------------|------------------------------------|
| <b>Schiff base ligands</b>                    | <b>N-H</b><br>(amide proton) | <b>-CH<sub>2</sub>-</b><br>(methylene proton) | <b>-C=N-CH<sub>3</sub></b><br>(methyl proton) |                                    |
| HL <sup>1</sup>                               | 10.99                        | 3.45                                          | 2.09                                          |                                    |
| HL <sup>2</sup>                               | 11.00                        | 3.50                                          | 2.09                                          |                                    |
| HL <sup>3</sup>                               | 9.96                         | 3.29                                          | 2.04                                          |                                    |
| <b><math>^{13}\text{C}</math> NMR signals</b> |                              |                                               |                                               |                                    |
| <b>Schiff base ligands</b>                    | <b>C=O</b><br>(amide)        | <b>C=N</b><br>(azomethine)                    | <b>C=O</b><br>(ester)                         | <b>-CH<sub>3</sub></b><br>(methyl) |
| HL <sup>1</sup>                               | 164.40                       | 155.66                                        | 169.80                                        | 16.30                              |
| HL <sup>2</sup>                               | 162.68                       | 155.35                                        | 174.04                                        | 22.49                              |
| HL <sup>3</sup>                               | 165.03                       | 155.60                                        | 166.79                                        | 18.02                              |

**Table S1: NMR data of INH-Schiff base ligands**

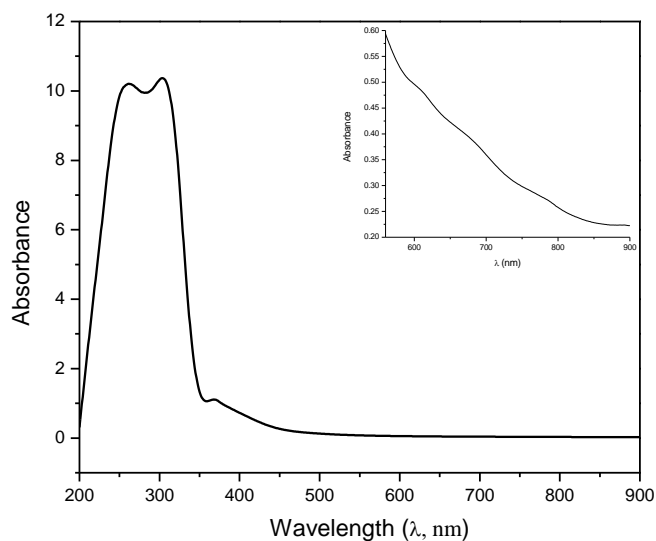

**Figure S4: Electronic spectrum of Ni(II) complex (4)**

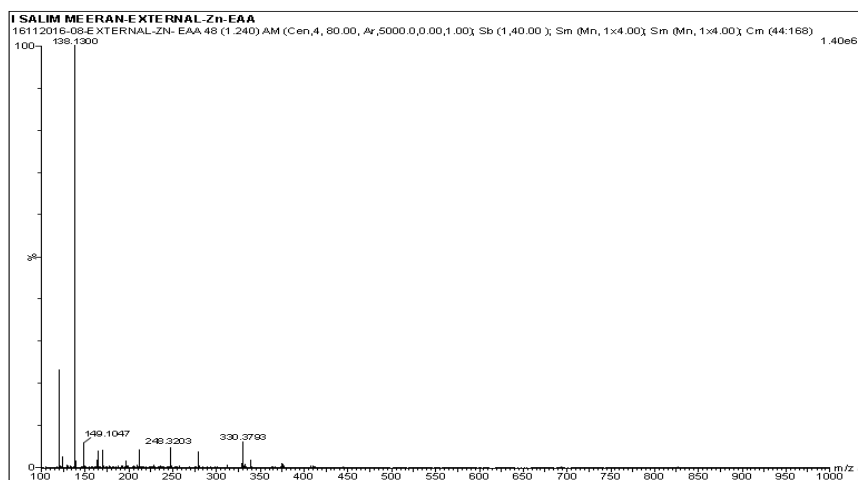

Figure S5: Mass spectrum of Zn(II) complex (12)

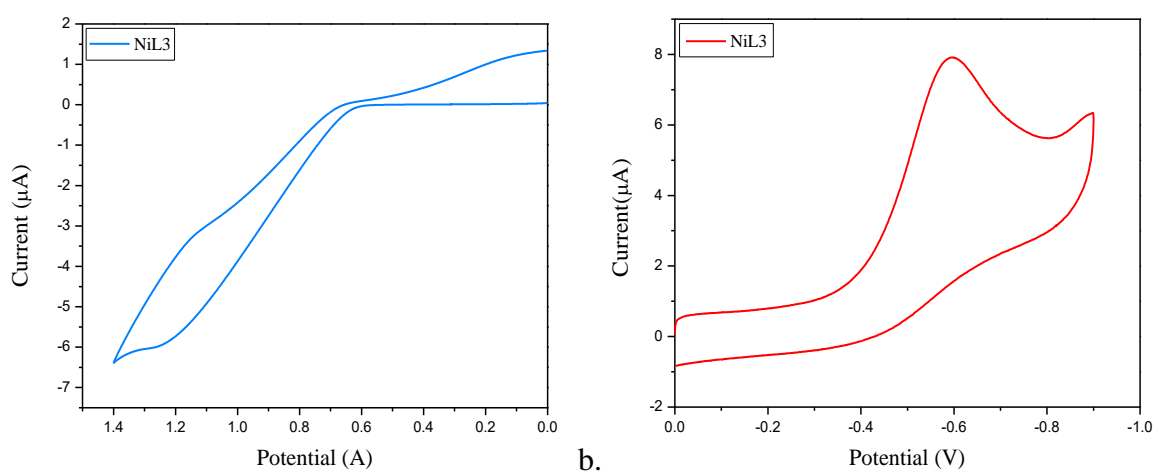

Figure S6: Cyclic voltammograms of Ni(II) complex (6): (a) anodic region and (b) cathodic region

| INH-SB | LUMO | Energy (AU) | $\Delta E$ (eV) | INH-SB | LUMO | Energy (AU) | $\Delta E$ (eV) |
|--------|------|-------------|-----------------|--------|------|-------------|-----------------|
|        | HOMO |             |                 |        | HOMO |             |                 |
| HL1    | 83   | 0.03856     | 5.13            | NiL1   | 173  | -0.27515    | 1.67            |
|        | 82   | -0.14986    |                 |        | 172  | -0.33645    |                 |
| HL2    | 63   | 0.03944     | 5.13            | NiL2   | 133  | -0.30884    | 1.05            |
|        | 62   | -0.14909    |                 |        | 132  | -0.34756    |                 |
| HL3    | 67   | 0.0399      | 5.11            | NiL3   | 141  | -0.29692    | 1.14            |
|        | 66   | -0.14785    |                 |        | 140  | -0.33872    |                 |
| CoL1   | 173  | -0.26134    | 2.66            | ZnL1   | 93   | -0.28754    | 2.48            |
|        | 172  | -0.35901    |                 |        | 92   | -0.37863    |                 |
| CoL2   | 132  | -0.29079    | 1.98            | ZnL2   | 73   | -0.32782    | 1.87            |
|        | 131  | -0.36362    |                 |        | 72   | -0.3967     |                 |
| CoL3   | 141  | -0.24354    | 2.52            | ZnL3   | 77   | -0.29159    | 2.42            |
|        | 140  | -0.33615    |                 |        | 76   | -0.3804     |                 |

Table S2: Energies of HOMO and LUMO of INH-SB ligands and complexes

| Compound             | Scavenging Activity (%) |       |       |       |        |
|----------------------|-------------------------|-------|-------|-------|--------|
|                      | 10 µg                   | 20 µg | 40 µg | 80 µg | 100 µg |
| <b>1</b>             | 54.3                    | 82.3  | 99.1  | 99.8  | 99.9   |
| <b>2</b>             | 70.7                    | 88.8  | 99.5  | 99.7  | 99.9   |
| <b>3</b>             | 77.2                    | 91.3  | 99.4  | 99.8  | 99.9   |
| <b>6</b>             | 92.0                    | 97.8  | 97.8  | 99.6  | 99.8   |
| <b>7</b>             | 95.7                    | 98.4  | 98.3  | 98.2  | 98.5   |
| <b>8</b>             | 96.9                    | 97.5  | 97.7  | 98.8  | 99.1   |
| <b>11</b>            | 74.4                    | 93.7  | 99.8  | 99.9  | 99.8   |
| <b>12</b>            | 51.2                    | 85.9  | 98.6  | 99.7  | 99.7   |
| <b>13</b>            | 55.6                    | 96.1  | 100.0 | 100.0 | 100.0  |
| <b>16</b>            | 95.3                    | 99.2  | 99.2  | 99.4  | 99.7   |
| <b>17</b>            | 94.5                    | 99.6  | 99.7  | 99.8  | 99.6   |
| <b>18</b>            | 89.2                    | 99.7  | 99.8  | 99.8  | 99.8   |
| <b>Ascorbic Acid</b> | 99.0                    | 99.4  | 100.0 | 100.0 | 100.0  |

**Table S3: ABTS Radical Scavenging Activity of INH-Schiff base ligands (1-5) and complexes (6-20) at 10 – 100 µg/mL concentrations**

| Compound             | Scavenging Activity (%) |           |           |           |           |
|----------------------|-------------------------|-----------|-----------|-----------|-----------|
|                      | 0.5 $\mu$ g             | 1 $\mu$ g | 2 $\mu$ g | 4 $\mu$ g | 8 $\mu$ g |
| <b>1</b>             | 5.4                     | 7.2       | 9.6       | 10.8      | 15.3      |
| <b>2</b>             | 7.7                     | 6.2       | 8.6       | 14.7      | 24.1      |
| <b>3</b>             | 1.9                     | 1.9       | 2.5       | 3.7       | 5.9       |
| <b>4</b>             | 9.8                     | 18.0      | 34.7      | 61.4      | 88.5      |
| <b>5</b>             | 16.9                    | 24.0      | 42.1      | 78.2      | 94.3      |
| <b>6</b>             | 13.8                    | 27.6      | 52.5      | 82.7      | 89.8      |
| <b>7</b>             | 0.8                     | 3.5       | 5.4       | 9.9       | 16.8      |
| <b>8</b>             | 3.9                     | 4.9       | 6.5       | 10.0      | 17.2      |
| <b>9</b>             | 2.4                     | 4.8       | 7.9       | 12.5      | 27.0      |
| <b>10</b>            | -14.5                   | -6.6      | 10.9      | 27.9      | 69.0      |
| <b>11</b>            | 23.4                    | 30.9      | 44.5      | 70.8      | 95.2      |
| <b>12</b>            | 17.5                    | 25.1      | 51.6      | 84.3      | 99.8      |
| <b>Ascorbic Acid</b> | 6.8                     | 7.0       | 7.3       | 8.3       | 10.7      |

**Table S4: ABTS Radical Scavenging Activity of INH-Schiff base ligands (1-5) and complexes (6-20) at 0.5 – 8  $\mu$ g/mL concentrations**

| Sample code      | Sample           | RLU    |        | Log <sub>10</sub> RLU |       |
|------------------|------------------|--------|--------|-----------------------|-------|
|                  |                  | 5 µg   | 10 µg  | 5 µg                  | 10 µg |
| <b>1</b>         | HL <sup>1</sup>  | 64     | 64     | 1.81                  | 1.81  |
| <b>2</b>         | HL <sup>2</sup>  | 60     | 68     | 1.78                  | 1.83  |
| <b>3</b>         | HL <sup>3</sup>  | 140684 | 120401 | 5.15                  | 5.08  |
| <b>6</b>         | NiL <sup>1</sup> | 71232  | 43598  | 4.85                  | 4.64  |
| <b>7</b>         | NiL <sup>2</sup> | 103539 | 43234  | 5.02                  | 4.64  |
| <b>8</b>         | NiL <sup>3</sup> | 75777  | 546    | 4.88                  | 2.74  |
| <b>11</b>        | CoL <sup>1</sup> | 74984  | 73603  | 4.87                  | 4.87  |
| <b>12</b>        | CoL <sup>2</sup> | 68790  | 87652  | 4.84                  | 4.94  |
| <b>13</b>        | CoL <sup>3</sup> | 77244  | 79237  | 4.89                  | 4.90  |
| <b>16</b>        | ZnL <sup>1</sup> | 53072  | 1385   | 4.72                  | 3.14  |
| <b>17</b>        | ZnL <sup>2</sup> | 57476  | 22645  | 4.76                  | 4.35  |
| <b>18</b>        | ZnL <sup>3</sup> | 18366  | 3545   | 4.26                  | 3.55  |
| <b>Control 1</b> |                  | 121025 |        | 5.08                  |       |
| <b>Control 2</b> |                  | 132684 |        | 5.12                  |       |

**Table S5: Anti-mycobacterial activity in RLU and log<sub>10</sub> RLU of INH-Schiff base ligands (1-3) and their complexes (4-12) using LRP assay**
